# Supplementary material
Source: publisher figshare collection journal article supplement (https://springernature.figshare.com/ndownloader/files/15744215)

**Supplementary figure 5 –Association of percentage of Th-17 lymphocytes and level of disease activity according to DAS28 (Kruskal-Wallis test, n =90).**


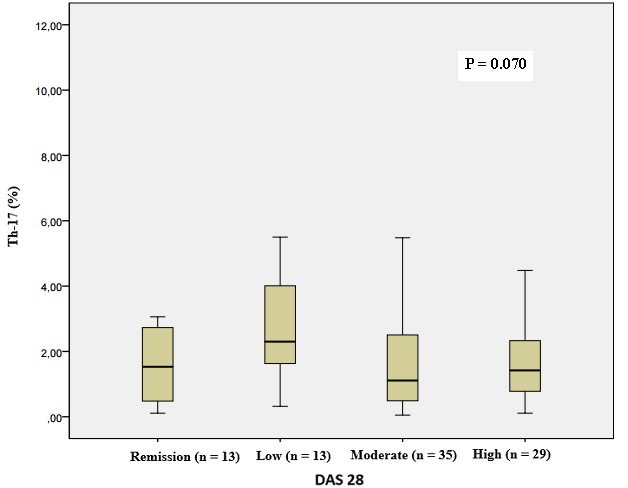

Supplement: Supplementary file 1 [file 15744215]
